# Supplementary material for: Higher Responsiveness to Rosuvastatin in Polygenic versus Monogenic Hypercholesterolemia: A Propensity Score Analysis
Source: PubMed Central journal article supplement (PMC7281142; doi:10.3390/life10050073), 2020-05-20
Supplement: life-10-00073-s001.pdf [file life-10-00073-s001.pdf]

# Higher Responsiveness to Rosuvastatin in Polygenic versus Monogenic Hypercholesterolaemia: A Propensity Score Analysis.

Agnieszka Mickiewicz <sup>1,\*</sup>, Marta Futema <sup>2</sup>, Agnieszka Ćwiklinska <sup>3</sup>, Agnieszka Kuchta <sup>3</sup>, Maciej Jankowski <sup>3</sup>, Mariusz Kaszubowski <sup>4</sup>, Magdalena Chmara <sup>5</sup>, Bartosz Wasąg <sup>5</sup>, Marcin Fijałkowski <sup>1</sup>, Miłosz Jaguszewski <sup>1</sup>, Steve E. Humphries <sup>6</sup>, and Marcin Gruchała <sup>1</sup>

<sup>1</sup> Department of Cardiology I, Medical University of Gdansk, Dębinki 7, 80-211 Gdańsk, Poland; marcin.fijalkowski@gumed.edu.pl (M.F.); milosz.jaguszewski@gumed.edu.pl (M.J.); marcin.gruchala@gumed.edu.pl (M.G.)

<sup>2</sup> Centre for Heart Muscle Disease, Institute of Cardiovascular Science, University College London, London WC1E 6BT, UK; marta.futema.10@ucl.ac.uk

<sup>3</sup> Department of Clinical Chemistry, Medical University of Gdansk, Dębinki 7, 80-211 Gdańsk, Poland; agnieszka.cwiklinska@gumed.edu.pl (A.C.); agnieszka.kuchta@gumed.edu.pl (A.K.); maciej.jankowski@gumed.edu.pl (M.J.)

<sup>4</sup> Institute of Statistics, Department of Economic Sciences, Faculty of Management and Economics, Gdansk University of Technology, 80-233 Gdańsk, Poland; agnieszka.kuchta@gumed.edu.pl

<sup>5</sup> Department of Biology and Genetics, Medical University of Gdansk, Dębinki 1, 80-211 Gdańsk, Poland; mchmara@gumed.edu.pl (M.C.); bwasag@gumed.edu.pl (B.W.)

<sup>6</sup> Centre for Cardiovascular Genetics, British Heart Foundation Laboratories, Institute of Cardiovascular Science, the Rayne Building University College London, London WC1E 6JF, UK; steve.humphries@ucl.ac.uk

\* Correspondence: amickiewicz@gumed.edu.pl; Tel.: +48-58-349-25-00; Fax: +48-58-346-12-01

Received: 22 April 2020; Accepted: 16 May 2020; Published: date

**Table S1.** Description of LDLR and APOB mutations in patients with monogenic hypercholesterolemia.

| Gene | cDNA Change                        | Protein Change              | Number of Affected Proband | ACGS Category |
|------|------------------------------------|-----------------------------|----------------------------|---------------|
| APOB | c.10580G > A                       | p.(R3527Q)                  | 7                          | 5             |
| LDLR | c.666C > A                         | p.(Cys222*)                 | 1                          | 5             |
| LDLR | c.(?-187)_(190+1_191+1)del         | Promoter - exon 2 deletion  | 2                          | 5             |
| LDLR | c.(67+1_68-1)_(313+1_314-1)del     | Exon 2 - exon 3 deletion    | 1                          | 5             |
| LDLR | c.2056C > T                        | p.(Gln686*)                 | 1                          | 5             |
| LDLR | c.(313+1_314-1)_(1186+1_1187-1)dup | Exon 4 - exon 8 duplication | 4                          | 5             |
| LDLR | c.693C > A                         | p.(Cys231*)                 | 1                          | 5             |
| LDLR | c.526_533dup                       | p.(Asp178Glufs*31)          | 1                          | 5             |
| LDLR | c.1141G > T                        | p.(Glu381*)                 | 2                          | 5             |
| LDLR | c.1775G > A                        | p.(Gly592Glu)               | 11                         | 4             |
| LDLR | c.798T > A                         | p.(Asp266Glu)               | 2                          | 4             |
| LDLR | c.1117G > T                        | p.(Gly373Cys)               | 1                          | 4             |
| LDLR | c.100T > G                         | p.(Cys34Gly)                | 1                          | 4             |
| LDLR | c.2000G > A                        | p.(Cys667Tyr)               | 1                          | 4             |
| LDLR | c.662A > G                         | p.(Asp221Gly)               | 4                          | 4             |
| LDLR | c.2483delA                         | p.(Tyr828Phefs*101)         | 1                          | 4             |
| LDLR | c.265T > C                         | p.(Cys89Arg)                | 1                          | 4             |
| LDLR | c.283T > C                         | p.(Cys95Arg)                | 1                          | 4             |
| LDLR | c.591C > G                         | p.(Cys197Trp)               | 1                          | 4             |

|             |              |               |   |   |
|-------------|--------------|---------------|---|---|
| <i>LDLR</i> | c.530C > T   | p.(Ser177Leu) | 1 | 4 |
| <i>LDLR</i> | c.1790C > A  | p.(Thr597Asn) | 1 | 4 |
| <i>LDLR</i> | c.191-1G > A | p.?           | 1 | 4 |
